# Supplementary material
Source: publisher figshare collection journal article supplement (https://gsajournals.figshare.com/ndownloader/files/23431160)
Supplement: Supplementary file 1 [file 23431160]

## Sheet: Rough.TableS1
	Combined Testis Weight (mg)			Total Sperm Count (million)			Round Spermatids (%)			Condensing Spermatids (%)
Strain	8 Weeks	20 Weeks	35 Weeks	8 Weeks	20 Weeks	35 Weeks	8 Weeks	20 Weeks	35 Weeks	8 Weeks	20 Weeks	35 Weeks
129PWKF1	147.95 ± 24.29	189.93 ± 2.57	183.8 ± 37.23	5.47 ± 1.38	12.69 ± 3.43	10.54 ± 4.24	100 ± 0	100 ± 0	100 ± 0	100 ± 0	100 ± 0	100 ± 0
AJPWKF1	127.62 ± 11.34	151.3 ± 3.92	144.43 ± 22.06	2.88 ± 0.63	8.87 ± 3.01	9.26 ± 2.03	100 ± 0	100 ± 0	100 ± 0	100 ± 0	100 ± 0	100 ± 0
B6PWKF1	142.37 ± 9.37	197.38 ± 9.96	197.36 ± 22.16	4.07 ± 0.33	16.87 ± 3.8	12.62 ± 3.53	100 ± 0	100 ± 0	100 ± 0	100 ± 0	99.44 ± 1.67	100 ± 0
DBAPWKF1	142.27 ± 10.94	152.38 ± 11.44	168.63 ± 15.26	4.06 ± 1.53	10.95 ± 2.17	12.22 ± 3.24	100 ± 0	100 ± 0	100 ± 0	100 ± 0	98.48 ± 2.36	100 ± 0
PWK129F1	102.5 ± 8.12	93.84 ± 6.65	88.01 ± 10.31	0.15 ± 0.21	0.66 ± 0.19	0.43 ± 0.37	82.67 ± 15.26	68.76 ± 16.21	63.96 ± 18.97	42.38 ± 17.2	27.27 ± 9.89	27.42 ± 24.14
PWKAJF1	99.64 ± 4.42	111.56 ± 8.92	93.87 ± 11.08	0.02 ± 0.04	1.38 ± 0.47	0.71 ± 0.59	91.04 ± 7.37	87.93 ± 8.17	69.87 ± 13.03	42.17 ± 16.4	51.96 ± 14.66	32.1 ± 14.55
PWKB6F1	80.09 ± 4.31	97.69 ± 13.46	81.76 ± 11.51	0.12 ± 0.13	2.4 ± 1.01	0.54 ± 0.36	69.76 ± 6.34	79.36 ± 14.27	35.33 ± 18.91	14.39 ± 5.35	69.31 ± 20.66	16.14 ± 11.44
PWKDBAF1	141 ± 9.77	134.74 ± 8.39	124.24 ± 10.65	1.55 ± 0.81	7.22 ± 3.96	3.45 ± 3.87	99.64 ± 1.01	99.52 ± 1.26	100 ± 0	98.81 ± 1.69	98.86 ± 2.02	94.31 ± 6.34
